# Supplementary material
Source: ML conference proceedings conference paper supplement (https://proceedings.neurips.cc/paper_files/paper/2022/hash/8829f586a1ac0e6c41143f5d57b63c4b-Abstract.html)
Supplement: Supplementary file 1 [file 8829f586a1ac0e6c41143f5d57b63c4b-Supplemental-Conference.zip]

Archive with 4 entries (4 files):
- 11592_contrastive_adapters_for_found_supplementary.pdf
- __MACOSX/._11592_contrastive_adapters_for_found_supplementary.pdf
- neurips_code_submission.zip
- __MACOSX/._neurips_code_submission.zip
